# Supplementary material
Source: PubMed Central journal article supplement (PMC2728965)
Supplement: 0903898106_0903898106SI.pdf [file 0903898106_0903898106SI.pdf]

# Supporting Information

Burgos et al. 10.1073/pnas.0903898106

## SI Text

**Protein Expression and Purification.** The enzyme was overexpressed in *Escherichia coli* BL21(DE3)pLys containing the expression plasmid pBAD DEST 49 with inserts of chemically synthesized DNA (DNA 2.0) encoding for human NAMPT and optimized for expression in *E. coli*. The soluble protein was purified by Ni-NTA affinity chromatography, and gel-filtration (HiLoad Superdex 200GP 26/60). The human NAMPT (10 mg mL<sup>-1</sup>) was concentrated to 50–75 mg mL<sup>-1</sup> in a buffer containing 20 mM Tris pH 7.5, 100 mM NaCl, and 10 mM  $\beta$ ME and stored at  $-80^{\circ}\text{C}$ .

**ADP/ATP Isotope Exchange Assay.** ADP/ATP isotope exchange reactions were carried out in 50 mM Hepes pH 7.5 with 50 mM

NaCl, 5 mM free MgCl<sub>2</sub>, and 1 mM THP at 25  $^{\circ}\text{C}$ . ADP (200  $\mu\text{M}$ , containing 10<sup>5</sup> cpm of [2, 8-<sup>3</sup>H]ADP per 100  $\mu\text{M}$  cold ADP) and ATP (1 mM) were present as equimolar mixtures with MgCl<sub>2</sub>. The reactions were started by addition of 0.6  $\mu\text{M}$  enzyme and 4 samples were quenched at 15-min intervals. Nucleotides were separated by HPLC to determinate the rate of the exchange reaction. The effect of BeF<sub>3</sub><sup>-</sup> on the exchange rate was monitored by incubating NAMPT (0.6  $\mu\text{M}$ ) with 6.2 mM MgCl<sub>2</sub>, 20 mM NaF, and varying concentrations of BeCl<sub>2</sub> (0 to 500  $\mu\text{M}$ ) during 2 periods of time (15 and 60 min, respectively); followed by the addition of a small volume to make the final concentrations of ADP 200  $\mu\text{M}$ , containing 10<sup>5</sup> cpm of [2, 8-<sup>3</sup>H]ADP per 100  $\mu\text{M}$  cold ADP, then ATP (1 mM) was rapidly added to initiate the exchange reaction. Determination of the exchange rates was performed as above.

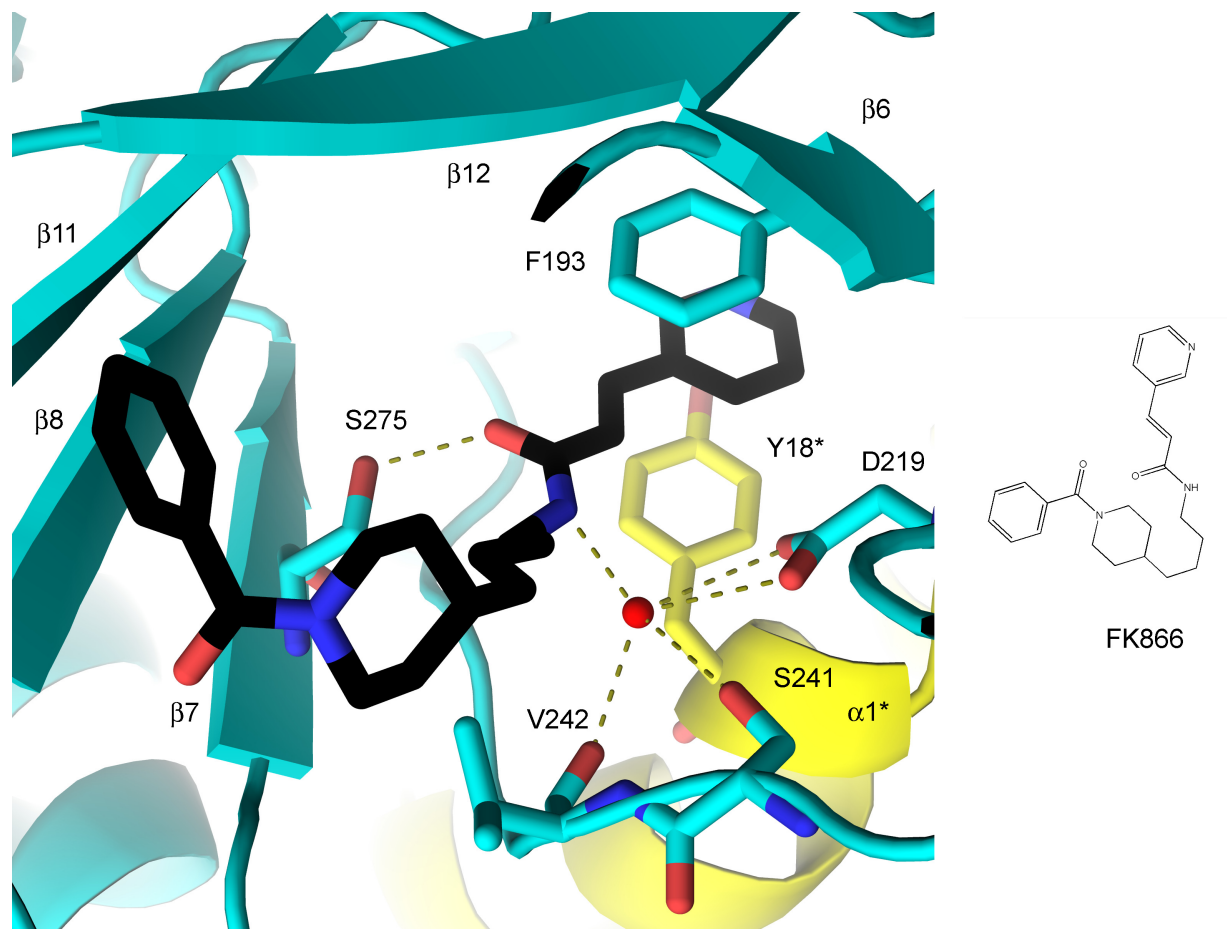

**Fig. S1.** Human NAMPT bound to FK866. Structure with 1 monomer in yellow, the other one in cyan. FK866 is depicted in black while water molecule is depicted as red sphere and olive dash lines represent hydrogen bonds between the inhibitor and residues of both monomers (PDB accession code 2GVJ). Produced with Pymol v 1.1.

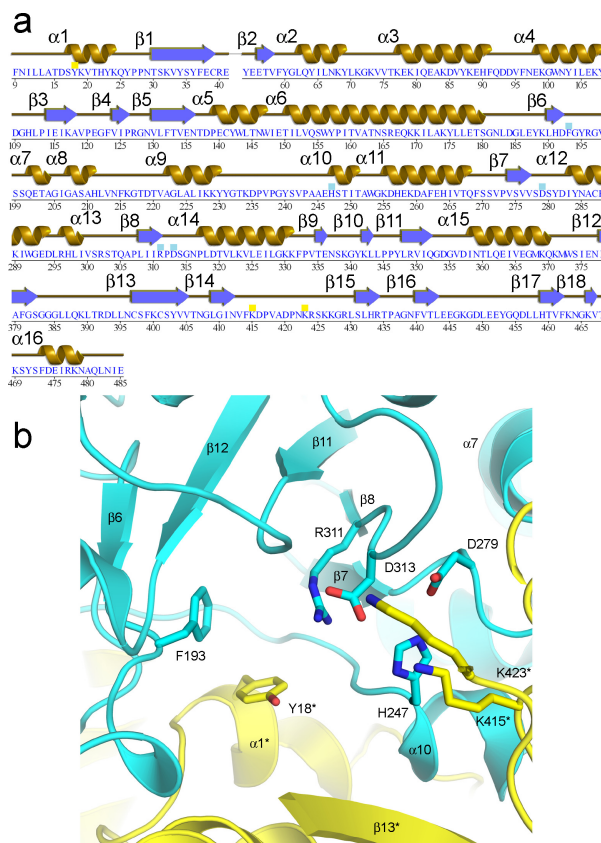

**Fig. S2.** Structure of Human NAMPT. (a) Structure-based sequence of human NAMPT.  $\alpha$ -Helices and  $\beta$ -strands are indicated above the sequence. Cyan and yellow squares are residues from the active site (involved in  $\pi$ -stacking interaction with the aromatic moiety of benzamide, NMN, and/or AMPCP; involved in hydrogen bonds with the diphosphate moiety of substrates and products or also the triad of residues conserved in all NAMPT and NAPT enzymes, including H247 at the proposed autophosphorylation site). (b) Ribbon diagram showing a close-up of the active site region. Elements and residues with \* are part of the monomer 1 (colored in yellow), others are from the monomer 2 (colored in cyan; AMPCP has been removed to simplify the figure). Produced with PyMol v 1.1.

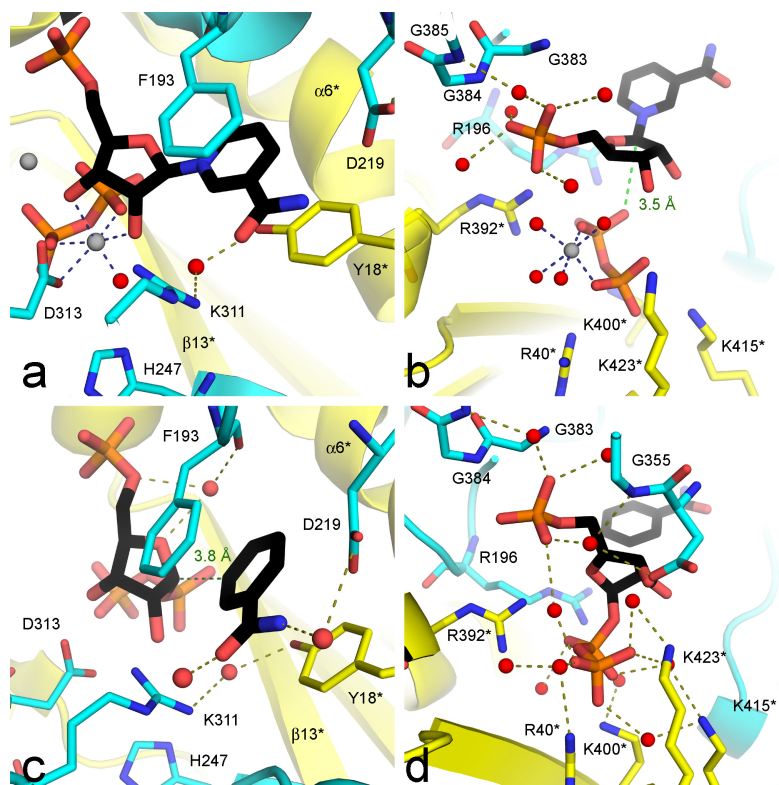

**Fig. S3.** Active site of H247-unmodified human NAMPT in interaction with the bimolecular complex NMN-Mg<sub>2</sub>PPi and PRPP-BzAM. The 2 monomers are colored in yellow and cyan, blue dash lines represent Mg<sup>2+</sup> (as gray spheres) interactions with PPi moiety. Water molecules are represented as red spheres and the corresponding hydrogen bonds shown as olive dash lines. (a) Presentation of the main interactions for the NAM and ribose moieties. NMN is shown in black. (b) Presentation of the main interactions for the diphosphate moiety. Green dash line represents interatomic distance  $d_2$  as summarized in Table 1. (c) Main interactions for the BzAM and ribose moieties (black). Green dash line represents interatomic distance  $d_1$  as summarized in Table 1. (d) Presentation of the main interactions for the diphosphate moiety. Produced with PyMol v 1.1.

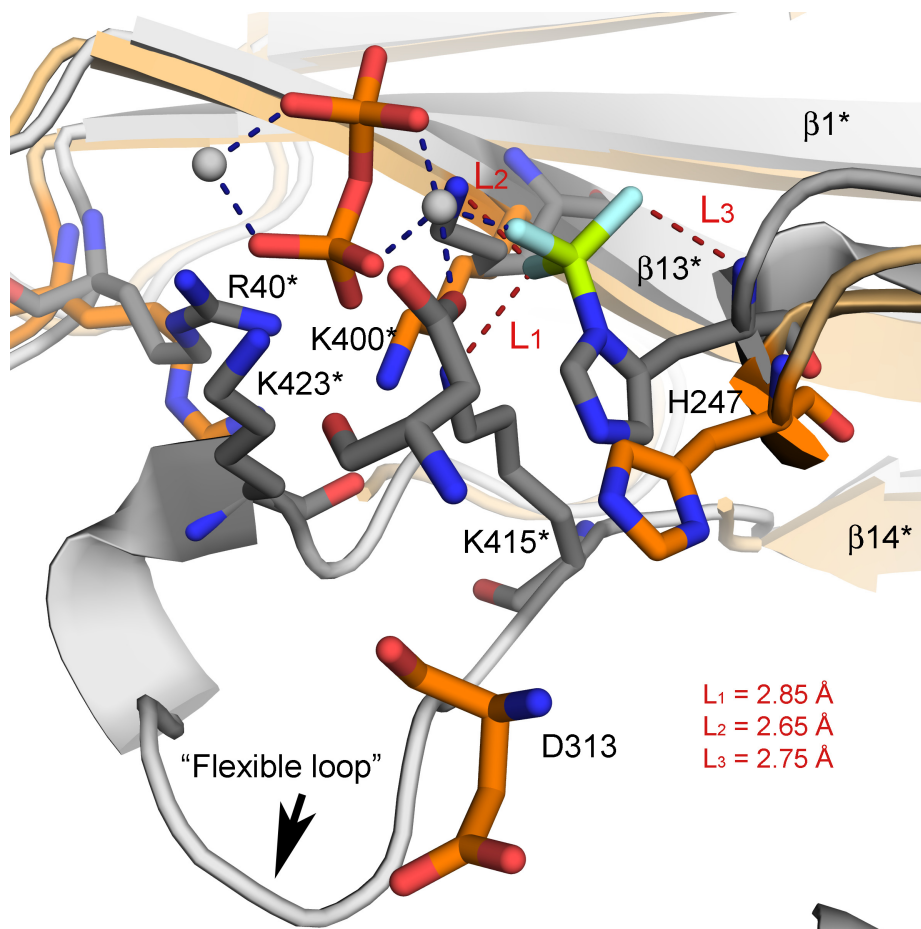

**Fig. S4.** The loop linking  $\beta 14^*$  to  $\beta 15^*$  and its induced motion upon PPI binding and phosphorylation of H247. Orange ribbons and residues represent the apo form of *Rattus norvegicus* NAMPT (2G95) while the second layer (gray) represents the (N81)H247-BeF<sub>3</sub><sup>-</sup>-NMN-Mg<sub>2</sub>PPI complex of human NAMPT (3DHF). Blue dash lines represent Mg<sup>2+</sup> (gray spheres) interactions with PPI and BeF<sub>3</sub><sup>-</sup>; red dash lines represent interatomic distances L<sub>1</sub>, L<sub>2</sub>, and L<sub>3</sub>. Produced with PyMol v 1.1.

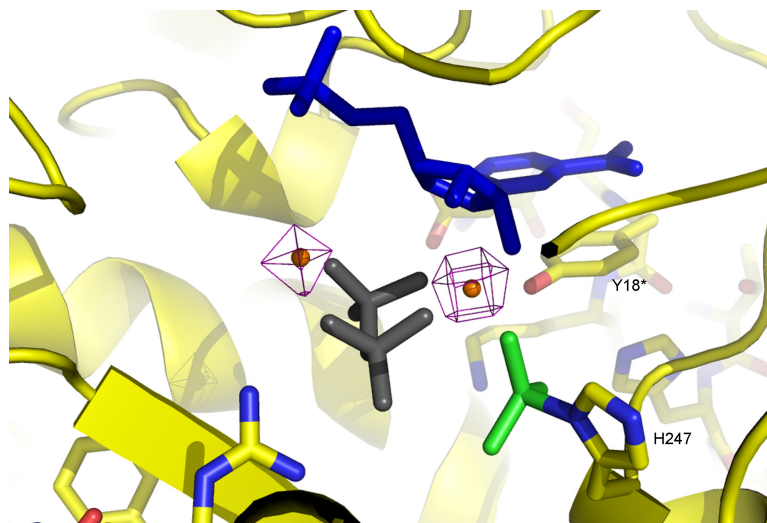

**Fig. S5.** The  $\text{Mn}^{2+}$  anomalous difference Fourier map at  $10\sigma$  level. The 2 peaks from  $\text{Mn}^{2+}$  anomalous difference Fourier map (colored in magenta) are overlaid perfectly with the 2 magnesium ions. The NMN, PPI, and  $\text{BeF}_3^-$  are colored in blue, gray, and green, respectively. Produced with PyMol v 1.1.



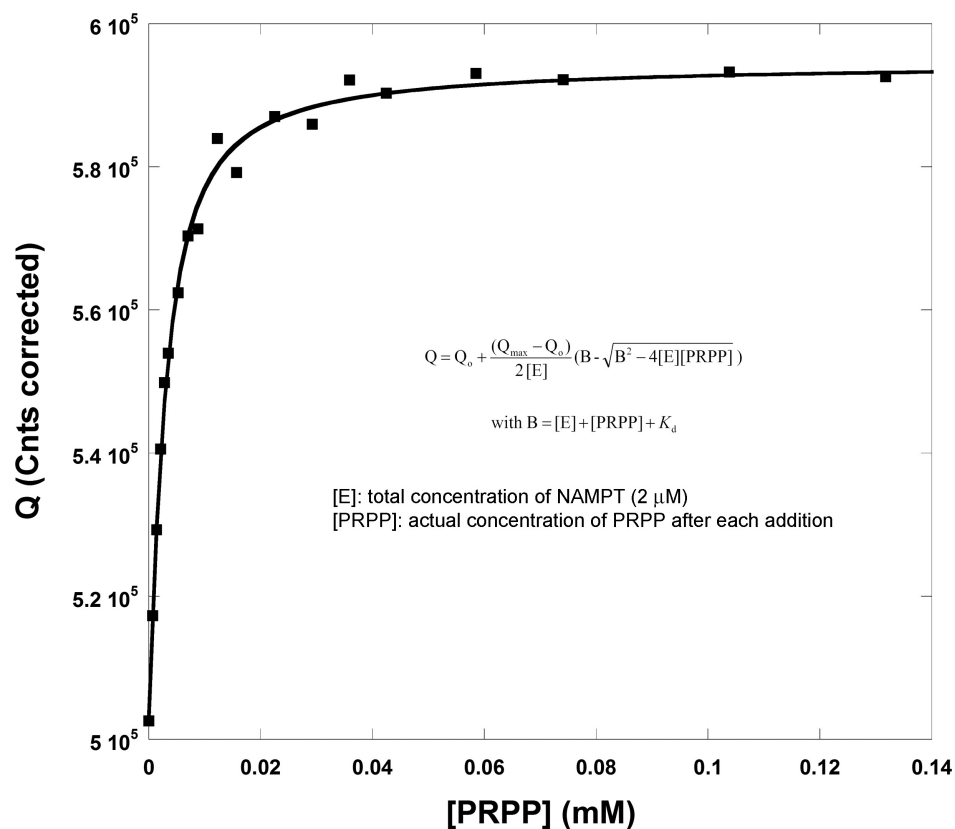

**Fig. S7.** Determination of the dissociation constant ( $K_d$ ) for PRPP by fluorescence with phosphorylated human NAMPT. The typical equation (solution for the second order polynomial expression of  $K_d$ ) fits the variations of fluorescence observed upon addition of PRPP on the phosphorylated enzyme.

**Table S1. Data collection and refinement statistics**

|                                                         | AMPcP                   | NMN and PPI             | NMN and PPI (BeF <sub>3</sub> <sup>−</sup> form) | PRPP and BzAM           | PRPP and BzAM (BeF <sub>3</sub> <sup>−</sup> form) |
|---------------------------------------------------------|-------------------------|-------------------------|--------------------------------------------------|-------------------------|----------------------------------------------------|
| PDB codes                                               | 3DGR                    | 3DHD                    | 3DHF                                             | 3DKJ                    | 3DKL                                               |
| Data collection                                         |                         |                         |                                                  |                         |                                                    |
| Space group                                             | <i>P</i> 2 <sub>1</sub> | <i>P</i> 2 <sub>1</sub> | <i>P</i> 2 <sub>1</sub>                          | <i>P</i> 2 <sub>1</sub> | <i>P</i> 2 <sub>1</sub>                            |
| Cell dimension                                          |                         |                         |                                                  |                         |                                                    |
| a, b, c (Å)                                             | 61.3, 107.2, 82.7       | 61.2, 107.1, 83.3       | 61.0, 106.4, 83.4                                | 61.2, 107.1, 83.3       | 61.2, 107.1, 83.3                                  |
| α, β, γ (°)                                             | 90, 96.4, 90            | 90, 97, 90              | 90, 96.9, 90                                     | 90, 97, 90              | 90, 97, 90                                         |
| Resolutions (Å)                                         | 20–2.1 (2.17–2.10)      | 20–2.0 (2.07–2.0)       | 50–1.8 (1.86–1.80)                               | 20–2.0 (2.07–2.0)       | 50–1.9 (1.97–1.89)                                 |
| <i>R</i> <sub>merge</sub> (%)                           | 7.4 (24.7)              | 6.8 (20.4)              | 5.4 (27.3)                                       | 6.1 (21.6)              | 8.2 (35.8)                                         |
| <i>I</i> / <i>σI</i>                                    | 8.3 (2.4)               | 18.3 (4.5)              | 8.2 (2.6)                                        | 22.1 (3.8)              | 7.1 (2.2)                                          |
| Completeness (%)                                        | 94.5 (63.6)             | 96.7 (75.2)             | 99.6 (96.5)                                      | 95.9 (73.9)             | 97.2 (82.0)                                        |
| Redundancy                                              | 3.6 (2.5)               | 3.6 (2.9)               | 4.1 (3.3)                                        | 3.9 (2.8)               | 3.9 (2.7)                                          |
| Refinement                                              |                         |                         |                                                  |                         |                                                    |
| Resolution (Å)                                          | 20–2.1                  | 20–2.0                  | 25.9–1.8                                         | 19.9–2.0                | 28.6–1.9                                           |
| No. reflections                                         | 58,607                  | 69,501                  | 97,445                                           | 68,540                  | 81,743                                             |
| <i>R</i> <sub>work</sub> / <i>R</i> <sub>free</sub> (%) | 18.0 / 22.5             | 18.0 / 22.1             | 16.0 / 19.6                                      | 16.8 / 20.9             | 17.7 / 21.4                                        |
| B-factors (Å <sup>2</sup> )                             |                         |                         |                                                  |                         |                                                    |
| Protein                                                 |                         |                         |                                                  |                         |                                                    |
| (main chain)                                            | 32.5                    | 23.4                    | 22.6                                             | 23.4                    | 16.5                                               |
| (side chain)                                            | 34.7                    | 25.1                    | 24.7                                             | 25.1                    | 19.1                                               |
| Water                                                   | 34.1                    | 27.3                    | 26.6                                             | 27.3                    | 25.4                                               |
| Ligand                                                  | 42.4                    | 24.6                    | 13.9                                             | 31.1                    | 20                                                 |
| NMN or PRPP                                             |                         | 23.1                    | 13.5                                             | 35.7                    | 20                                                 |
| PPI or BzAM                                             |                         | 26.8                    | 14.1                                             | 19.8                    | 18.7                                               |
| BeF <sub>3</sub> <sup>−</sup>                           |                         |                         | 14.2                                             |                         | 21.2                                               |
| R.m.s deviations                                        |                         |                         |                                                  |                         |                                                    |
| Bond lengths (Å)                                        | 0.016                   | 0.018                   | 0.014                                            | 0.014                   | 0.019                                              |
| Bond angles (°)                                         | 1.49                    | 1.60                    | 1.45                                             | 1.50                    | 1.69                                               |

Numbers in parentheses are for the highest-resolution shell. One crystal was used for each data set.
